# Supplementary material for: Modulated interfacial electron transfer of MXene-Tx@CoS for the oxygen evolution reaction
Source: Royal Society of Chemistry journal article supplement (doi:10.1039/d3se00698k), 2023-01-01
Supplement: d3se00698k1.pdf [file d3se00698k1.pdf]

## *Supporting Information*

### **Modulated interfacial electron transfer of MXene-T<sub>x</sub>@CoS for oxygen evolution reaction**

Xinying Du,<sup>a</sup> Xiaoyun Zhang,<sup>a</sup> Shifan Zhu,<sup>a</sup> Yixue Xu,<sup>a</sup> Yuqiao Wang<sup>\*a,b</sup>

*a* Research Center for Nano Photoelectrochemistry and Devices, School of Chemistry and Chemical Engineering, Southeast University, Nanjing 211189, China

*b* Yangtze River Delta Carbon Neutrality Strategy Development Institute, Southeast University, Nanjing 210096, China

\* Corresponding author. Tel. & Fax +862552090621

E-mail address: yqwang@seu.edu.cn (Y. Wang).

#### **1. DFT Calculations**

DFT calculations were performed by using Vienna Ab initio Simulation Package (VASP). The generalized-gradient approximation with Perdew-Burke-Ernzerhof (GGA-PBE) was used for the exchange-correlation interactions. The cutoff energy was set to 500 eV for the plane wave basis. The convergence threshold was conducted as 10<sup>-6</sup> eV and 0.01 eV Å<sup>-1</sup> for energy and force, respectively. Monkhorst-Pack grid of 3 × 2 × 1 was used for the DFT calculations.

The four-electron pathway for OER in alkaline can be summarized as follows:

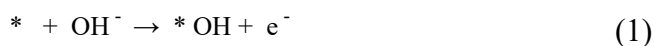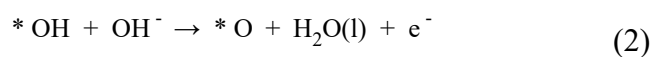

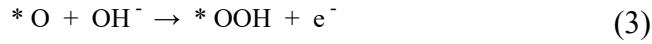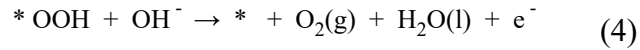

where \* meant the active site on the surface, \*OH, \*O and \*OOH represented the absorbed intermediates of OER.

The change of Gibbs free energy of each OER step ( $\Delta G_i$ ,  $i = 1,2,3,4$ ) was evaluated by the following equation:

$$\Delta G_i = \Delta E + \Delta ZPE - T\Delta S \quad (5)$$

where  $\Delta E$  was the change of total energy.  $\Delta ZPE$  and  $\Delta S$  were the change of the zero-point and entropic contribution, respectively.

The theoretical overpotential  $\eta$  was defined by the equation:

$$\eta = \max \{\Delta G_1, \Delta G_2, \Delta G_3, \Delta G_4\} / e - 1.23V \quad (6)$$

## 2. Materials characterization

The morphologies and micro-structures of samples were examined by transmission electron microscopy (TEM) and atomic force microscope (AFM, Dimension ICON). TEM, scanning transmission electron microscopy (STEM) and corresponding the energy-dispersive X-ray spectroscopy (EDS) elemental mappings were processed on a FEI Talos microscope with a 200 kV accelerating voltage. The crystalline phase was analysed by X-ray diffraction (XRD, Shimadzu XD-3A) using Cu K $\alpha$  radiation. X-ray photoelectron spectroscopy (XPS, Kratos AXIS ULTRA) was performed to investigate the valence state of the samples.

### 3. Results and discussions

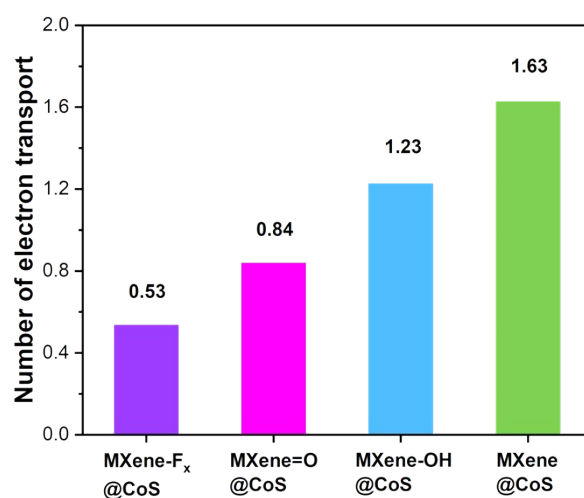

**Fig. S1** Interface electron transfer number of MXene-F@CoS, MXene=O@CoS, MXene-OH@CoS and MXene@CoS.

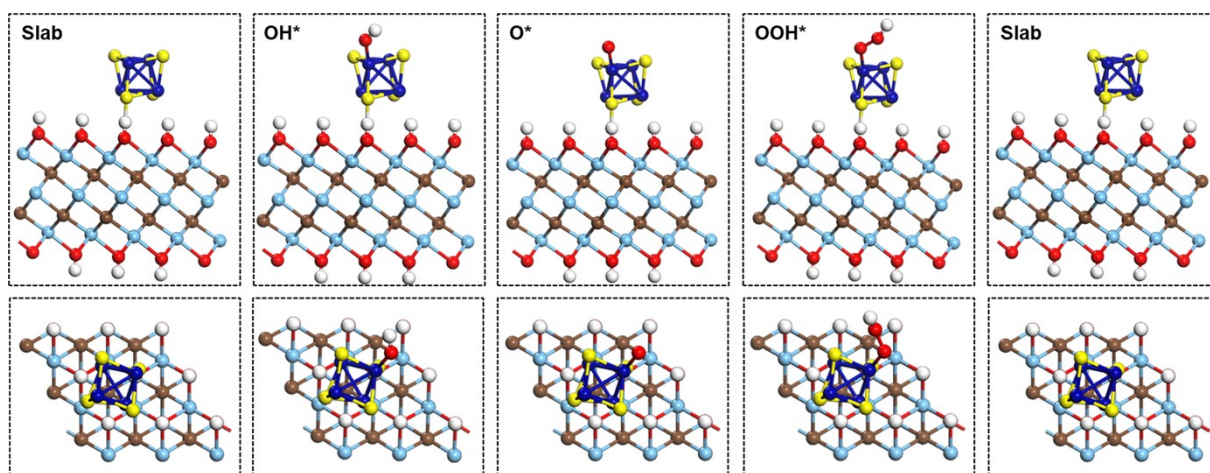

**Fig. S2** Adsorption models based on MXene-OH@CoS cell.

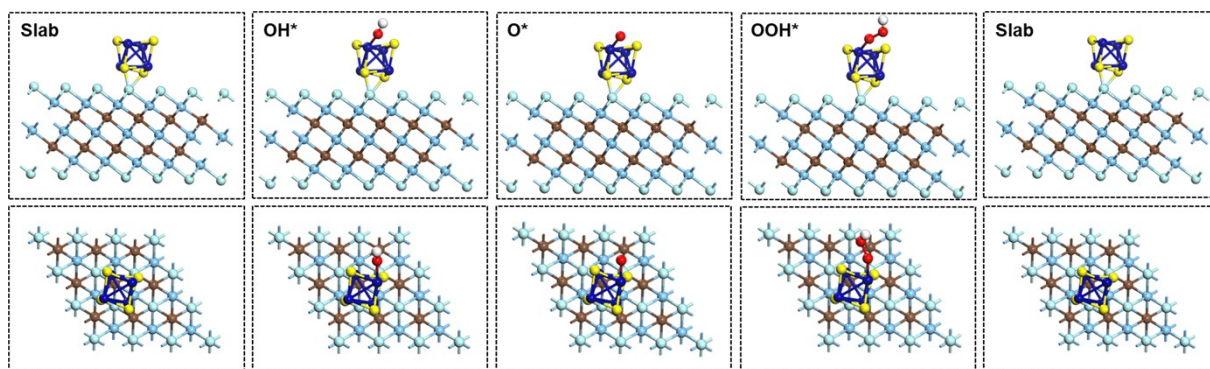

**Fig. S3** Adsorption models based on MXene-F@CoS cell.

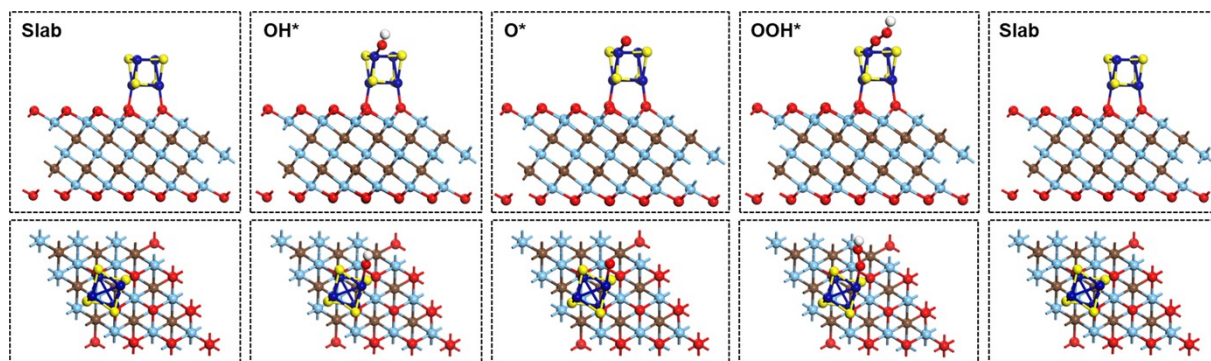

**Fig. S4** Adsorption models based on MXene=O@CoS cell.

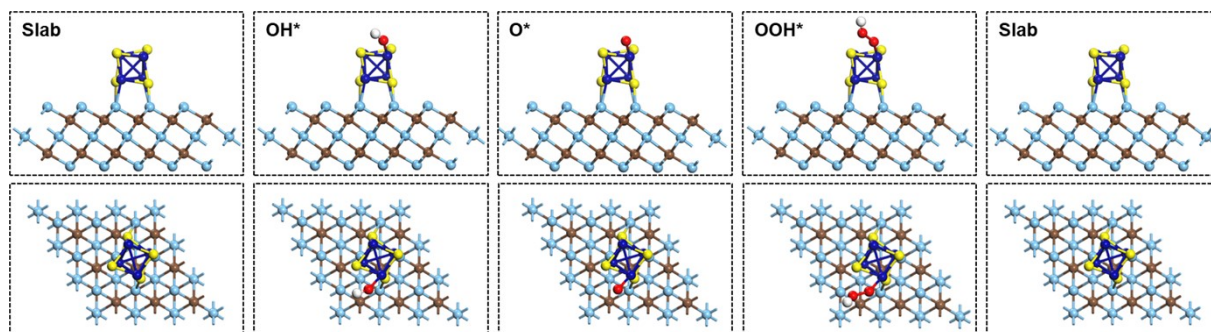

**Fig. S5** Adsorption models based on MXene @CoS cell.

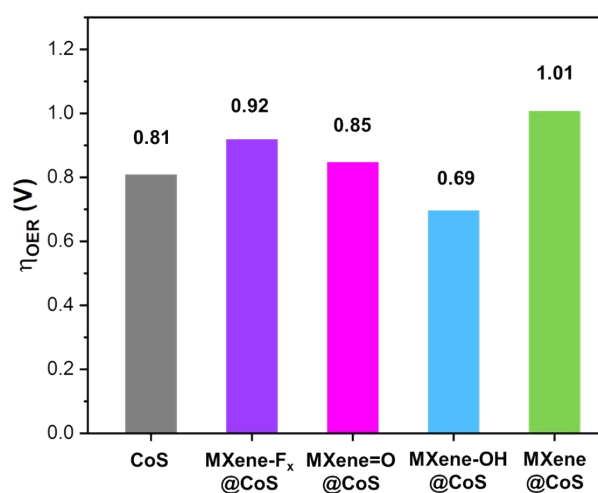

**Fig. S6** OER overpotential ( $\eta_{\text{OER}}$ ) of CoS, MXene-F@CoS, MXene=O@CoS, MXene-OH@CoS and MXene@CoS.

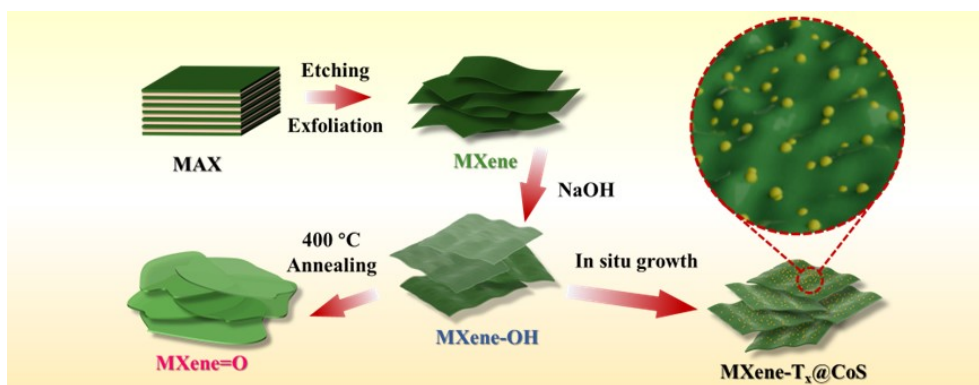

**Fig. S7** Schematic illustration of constructing of MXene- $T_x@CoS$ .

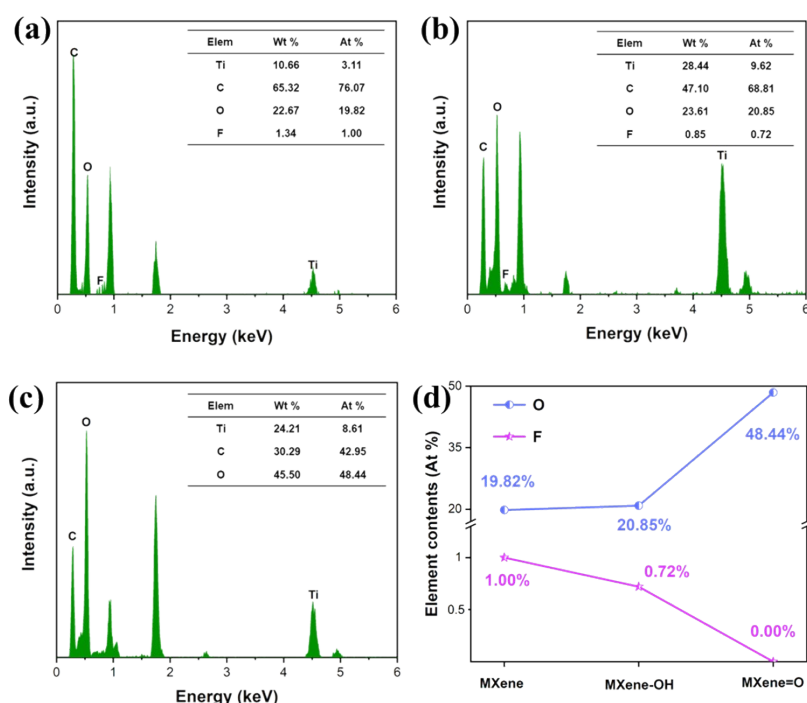

**Fig. S8** EDS spectra and the element contents: (a) MXene, (b) MXene-OH and (c) MXene=O,

(d) element contents (O and F) of three types of MXene- $T_x$ .

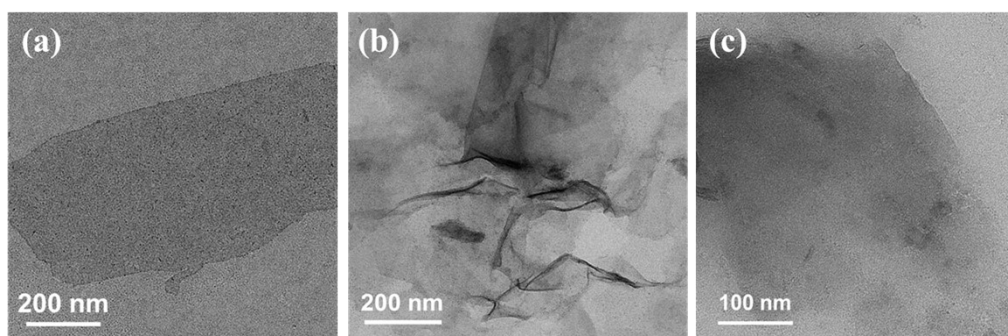

**Fig. S9** TEM images of (a) MXene, (b) MXene-OH, and (c) MXene=O.

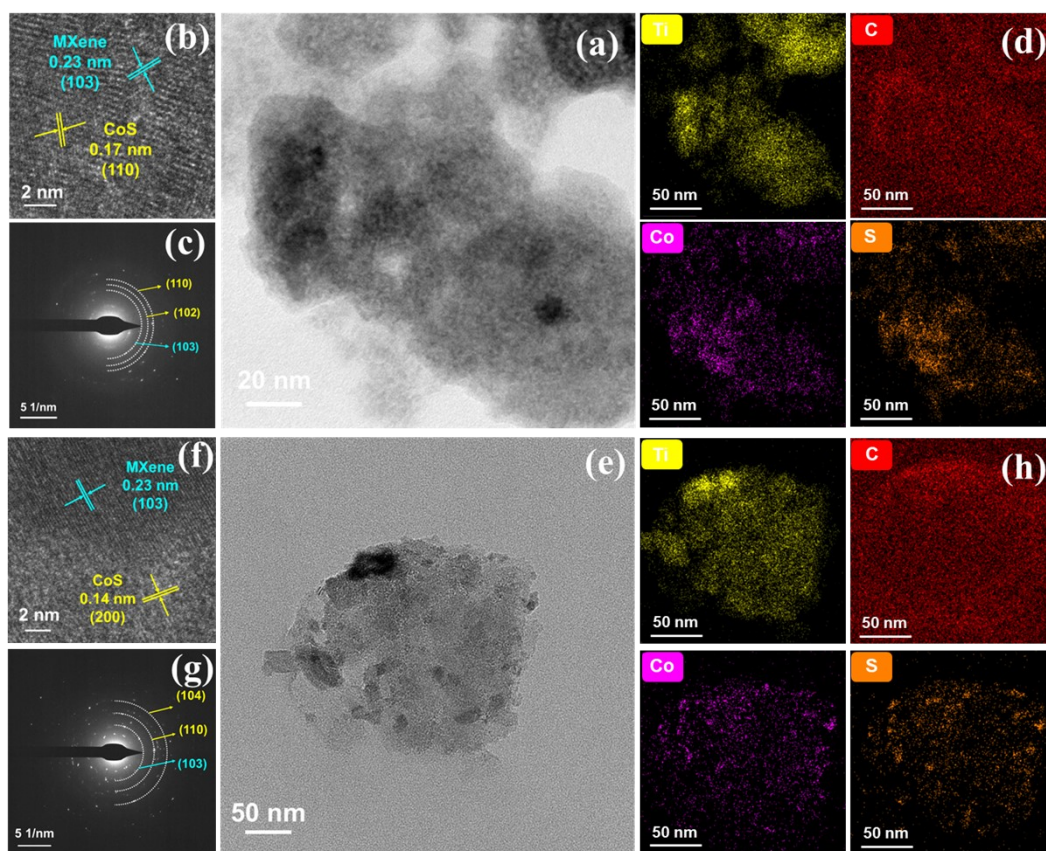

**Fig. S10** MXene@CoS: (a) TEM image, (b) HRTEM image, (c) SAED pattern, and (d) elemental mapping images. MXene=O@CoS: (e) TEM image, (f) HRTEM image, (j) SAED pattern, and (h) elemental mapping images.

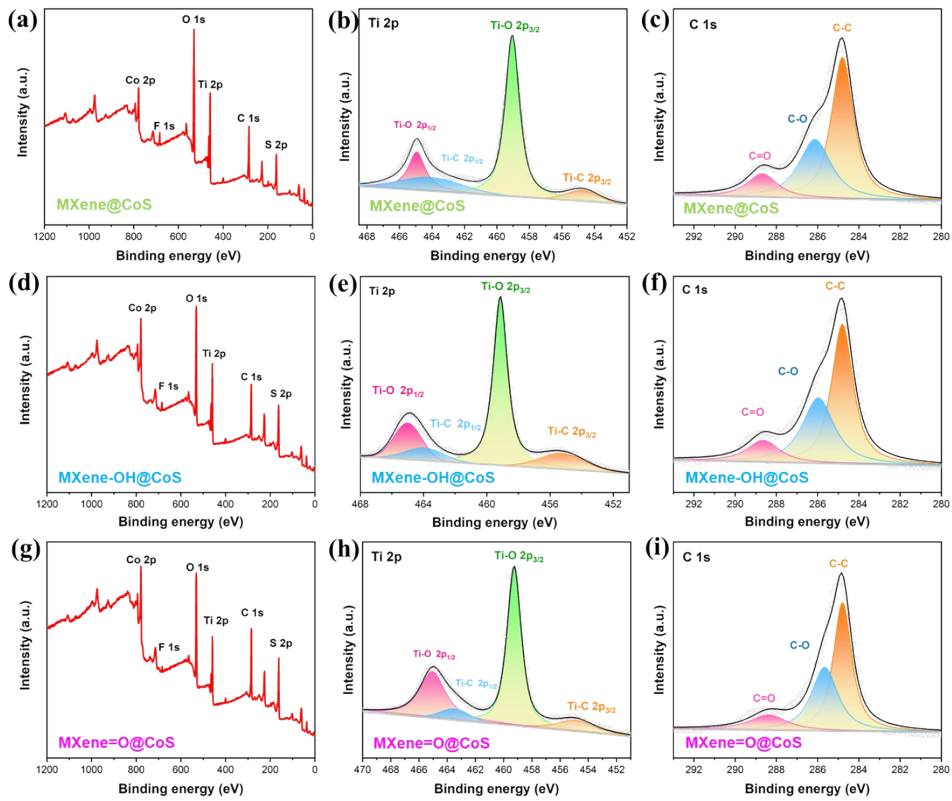

**Fig. S11** MXene@CoS: (a) XPS survey curve, spectra of (b) Ti 2p and (c) C 1s; MXene-OH@CoS: (d) XPS survey curve, spectra of (e) Ti 2p and (f) C 1s; MXene=O@CoS: (g) XPS survey curve, spectra of (h) Ti 2p and (i) C 1s.

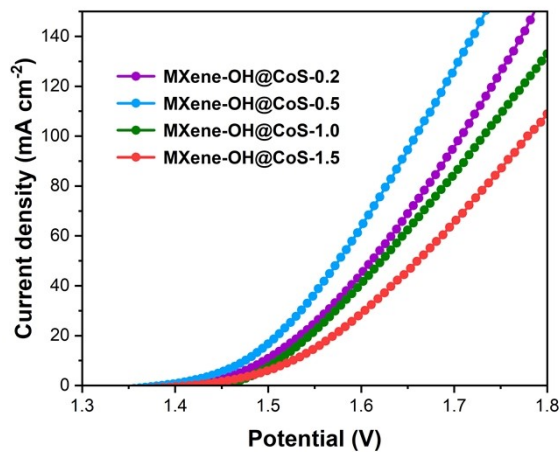

**Fig. S12** LSV curves for different contents of CoS in MXene-OH@CoS (0.2, 0.5, 1.0 and 1.5 mmol represent the amount of substance of CoS in 40 mg MXene-OH).

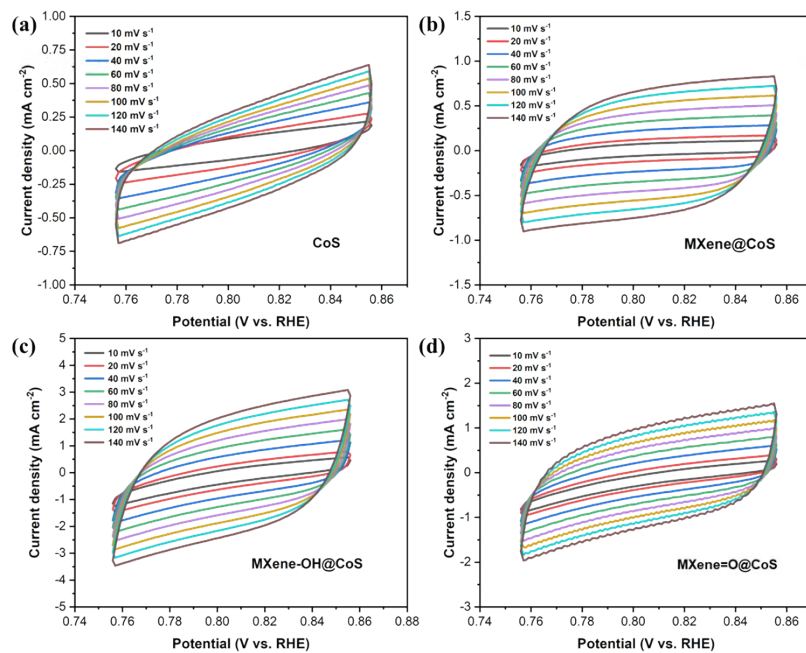

**Fig. S13** CV curves of (a) CoS, (b) MXene@CoS, (c) MXene-OH@CoS and (d) MXene=O@CoS.

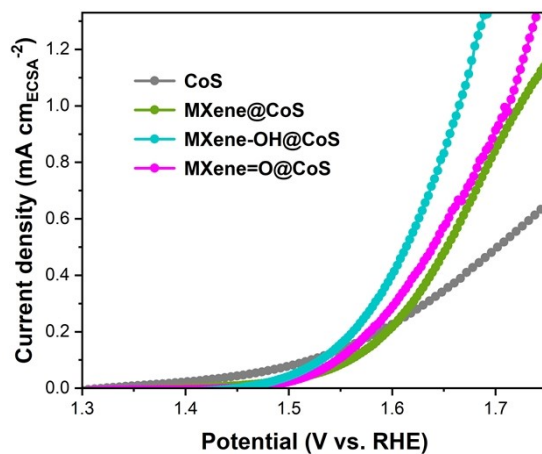

**Fig. S14** ECSA-normalized LSV curves of CoS, MXene@CoS, MXene-OH@CoS and MXene=O@CoS.



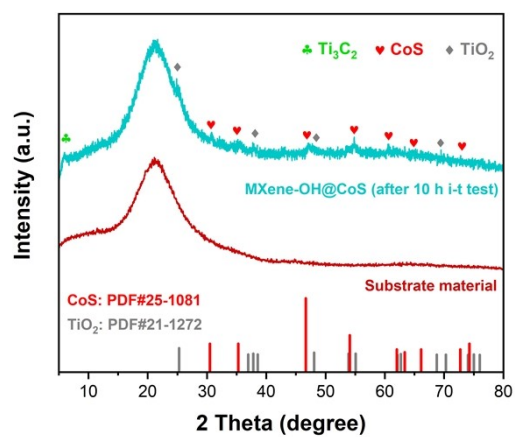

**Fig S15** XRD patterns of MXene-OH@CoS after 10 h i-t test.

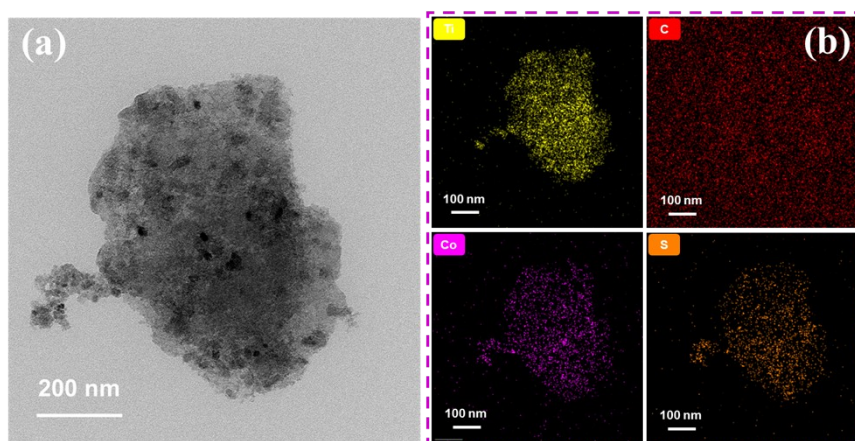

**Fig. S16** Images of MXene-OH@CoS after 10 h i-t test: (a) TEM, (b) elemental mapping.

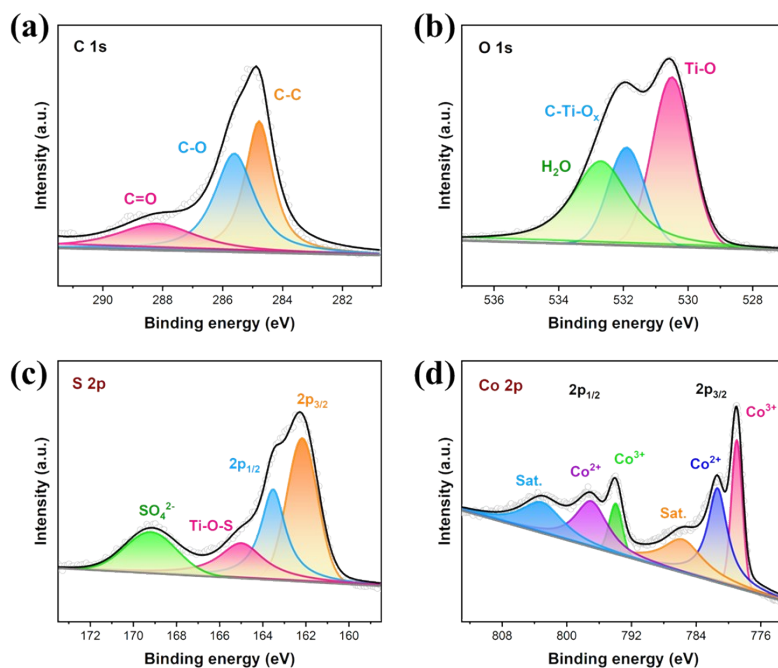

**Fig. S17** XPS spectra of MXene-OH@CoS after 10 h i-t test: (a) C 1s, (b) O 1s, (c) S 2p, (d) Co 2p.

**Table S1.** Calculated values of gibbs free energy on MXene-T<sub>x</sub>@CoS slab models.

| Intermediates | G (eV) (U = 1.23 V) |                              |                 |                  |               |
|---------------|---------------------|------------------------------|-----------------|------------------|---------------|
|               | CoS                 | MXene-F <sub>x</sub><br>@CoS | MXene=O<br>@CoS | MXene-OH<br>@CoS | MXene<br>@CoS |
| OH*           | -1.23               | -0.92                        | -1.01           | -1.28            | -1.79         |
| O*            | -1.29               | -1.11                        | -1.13           | -1.26            | -1.97         |
| OOH*          | -0.48               | -0.19                        | -0.28           | -0.69            | -1.01         |

**Table S2** Interplanar spacing of MXene (002), MXene-OH (002), MXene=O (002).

| (002)    | 2θ    | d (nm) |
|----------|-------|--------|
| MXene    | 6.30° | 1.40   |
| MXene-OH | 5.90° | 1.50   |

**Table S3** The relative content of Co(III) and Co(II).

| Electrocatalyst | Co(III)/Co(II) |
|-----------------|----------------|
| CoS             | 0.80           |
| MXene@CoS       | 1.24           |
| MXene-OH@CoS    | 1.27           |
| MXene=O@CoS     | 1.26           |

**Table S4.** Comparisons of OER performance of recently reported catalysts

| Electrocatalyst                                     | OER performance<br>(1M KOH) |                                        | References |
|-----------------------------------------------------|-----------------------------|----------------------------------------|------------|
|                                                     | $\eta_{10}$ (mV)            | Tafel slope<br>(mV dec <sup>-1</sup> ) |            |
| MXene-OH@CoS                                        | 244                         | 34.9                                   | This work  |
| CoOOH/Co <sub>9</sub> S <sub>8</sub>                | 246                         | 86.4                                   | [1]        |
| Ti <sub>3</sub> C <sub>2</sub> O <sub>2</sub> @GQDs | 250                         | 39.0                                   | [2]        |
| NiCo <sub>2</sub> (OH) <sub>x</sub> /MXene          | 268                         | 87.0                                   | [3]        |
| CeO <sub>2</sub> @CoS/MoS <sub>2</sub>              | 247                         | 64.0                                   | [4]        |
| Co@CoFe-P NBs                                       | 266                         | 34.5                                   | [5]        |
| NiFeLa-LDH/v-MXene                                  | 255                         | 40.0                                   | [6]        |
| P-CoS <sub>2</sub>                                  | 250                         | 90.0                                   | [7]        |
| CoP/Mo <sub>2</sub> CT <sub>x</sub>                 | 260                         | 51.0                                   | [8]        |
| N-CoS <sub>2</sub> YSSs                             | 278                         | 56.0                                   | [9]        |
| CoFeS <sub>2</sub> /NC                              | 340                         | 56.2                                   | [10]       |
| Fe/Co-CNT@MXene                                     | 360                         | 80.0                                   | [11]       |
| CoS/CoO PNRs                                        | 265                         | 76.7                                   | [12]       |

|                                                                         |     |      |      |
|-------------------------------------------------------------------------|-----|------|------|
| Fe <sub>MC</sub> -MXene/GrH                                             | 296 | 58.2 | [13] |
| H <sub>2</sub> PO <sub>4</sub> <sup>2-</sup> /FeNi-LDH-V <sub>2</sub> C | 250 | 46.5 | [14] |
| NiFeP/MXene                                                             | 286 | 35.0 | [15] |

**Table S5.** The fitted parameters for the Nyquist plots using the equivalent circuit.

| Catalyst     | R <sub>s</sub> (Ω) | R <sub>1</sub> (Ω) | R <sub>2</sub> (Ω) | R <sub>total</sub> (Ω) |
|--------------|--------------------|--------------------|--------------------|------------------------|
| MXene@CoS    | 2.238              | 0.5322             | 2.229              | 2.761                  |
| MXene-OH@CoS | 1.605              | 0.2397             | 2.161              | 2.401                  |
| MXene=O@CoS  | 1.607              | 0.7442             | 2.363              | 3.107                  |
| CoS          | 2.277              | -                  | 6.749              | 6.749                  |

## References

- 1 N. Yao, G. Wang, H. Jia, J. Yin, H. Cong, S. Chen and W. Luo, *Angew Chem Int Ed Engl*, 2022, **61**, e202117178.
- 2 Y. Ma, Y. An, Z. Xu, L. Cheng and W. Yuan, *Science China Materials*, 2022, **65**, 3053-3061.
- 3 J. Xu, X. Zhong, X. Wu, Y. Wang and S. Feng, *J. Energy Chem.*, 2022, **71**, 129-140.
- 4 W.-H. Huang, X. M. Li, X. F. Yang, H. Y. Zhang, P. B. Liu, Y. M. Ma and X. Lu, *Chem. Eng. J.*, 2021, **420**.
- 5 Y. Zhao, N. Dongfang, C. A. Triana, C. Huang, R. Erni, W. Wan, J. Li, D. Stoian, L. Pan, P. Zhang, J. Lan, M. Iannuzzi and G. R. Patzke, *Energy Environ. Sci.*, 2022, **15**, 727-739.
- 6 M. Yu, J. Zheng and M. Guo, *J. Energy Chem.*, 2022, **70**, 472-479.
- 7 Y. Li, Z. Mao, Q. Wang, D. Li, R. Wang, B. He, Y. Gong and H. Wang, *Chem. Eng. J.*, 2020, **390**.
- 8 S. Liu, Z. Lin, R. Wan, Y. Liu, Z. Liu, S. Zhang, X. Zhang, Z. Tang, X. Lu and Y. Tian, *J. Mater. Chem. A*, 2021, **9**, 21259-21269.
- 9 X. F. Lu, S. L. Zhang, E. Shangguan, P. Zhang, S. Gao and X. W. D. Lou, *Adv.Sci.*, 2020, **7**, 2001178.
- 10 J. Cai, H. Liu, Y. Luo, Y. Xiong, L. Zhang, S. Wang, K. Xiao and Z. Q. Liu, *J. Energy Chem.*, 2022, **74**, 420-428.
- 11 C. Zhang, H. Dong, B. Chen, T. Jin, J. Nie and G. Ma, *Carbon*, 2021, **185**, 17-26.
- 12 Y. Wang, X. Wu, X. Jiang, X. Wu, Y. Tang, D. Sun and G. Fu, *Chem. Eng. J.*, 2022, **434**.
- 13 T. H. Nguyen, P. K. L. Tran, V. A. Dinh, D. T. Tran, N. H. Kim and J. H. Lee, *Adv. Funct. Mater.*, 2023, **33**, 2210101.
- 14 Y. Chen, H. Yao, F. Kong, H. Tian, G. Meng, S. Wang, X. Mao, X. Cui, X. Hou and J. Shi, *Appl. Catal. B-Environ.*, 2021, **297**, 120474.

15 J. Chen, Q. Long, K. Xiao, T. Ouyang, N. Li, S. Ye and Z. Q. Liu, *Sci. Bull.*, 2021, **66**, 1063-1072.
